# Supplementary material for: 17β-Estradiol (E2) Activates Matrix Mineralization through Genomic/Nongenomic Pathways in MC3T3-E1 Cells
Source: MDPI journal article supplement (doi:10.3390/ijms25094727), 2024-04-26
Supplement: s1 [file s1]

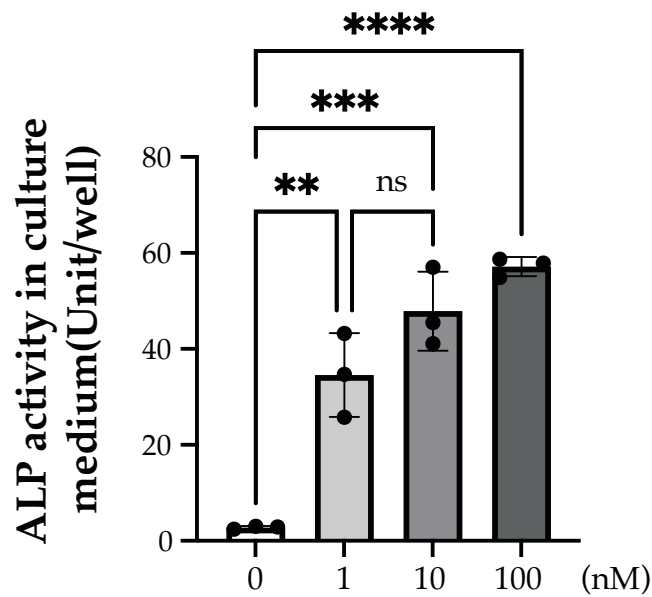

**Supplementary Figure S2. The effect of E2 treatment on ALP activity of MC3T3-E1 in stripped FBS culture.**

ALP assay. ALP activities in the culture medium at Day 9 of the cells stimulated with/without E2 (1-100 nM) at Day 0. Data presented as mean  $\pm$  SD (n=3) are representative of at least three independent experiments. \*\* $P < 0.01$ , \*\*\* $P < 0.001$  and \*\*\*\* $P < 0.0001$  versus control (no E2) using Bonferroni' s test. ns: not significant.
