# Supplementary material for: 17β-Estradiol (E2) Activates Matrix Mineralization through Genomic/Nongenomic Pathways in MC3T3-E1 Cells
Source: MDPI journal article supplement (doi:10.3390/ijms25094727), 2024-04-26
Supplement: s1 [file s1]

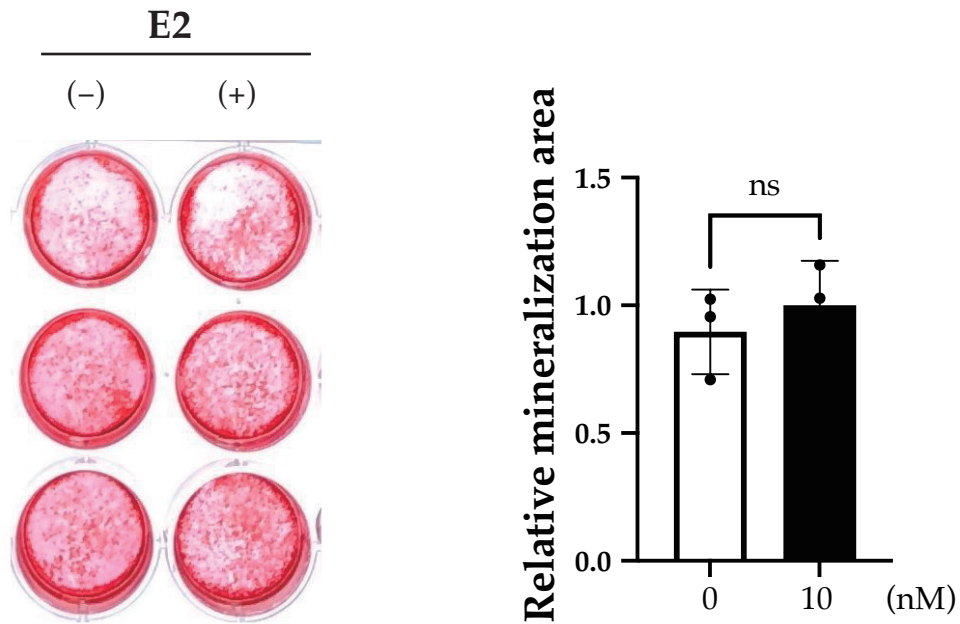

**Supplementary Figure S3. The effect of E2 treatment on matrix mineralization of MC3T3-E1 in standard FBS culture.**

Matrix mineralization assay. MC3T3-E1 were cultured in the media including standard FBS with AA/ $\beta$ GP and stimulated with or without E2 (10 nM) at Day 0. The cells were fixed with 10% formaldehyde and stained with Alizarin Red S at Day 12. Data presented as mean  $\pm$  SD (n=3) are representative of at least three independent experiments. ns: not significant.
